# Supplementary material for: Exposure of adult sea urchin Strongylocentrotus intermedius to stranded heavy fuel oil causes developmental toxicity on larval offspring
Source: PeerJ. 2022 Apr 19;10:e13298. doi: 10.7717/peerj.13298 (PMC9029359; doi:10.7717/peerj.13298)
Supplement: Supplemental Information 1 — Data on spawning, fecundity, fertilization, ROS level, 3-NTP level, PC level and larval size. [file peerj-10-13298-s001.xlsx]

## Sheet: Spawning
The number of spawned sea urchin (Y: Yes, N: No)
	Male	Female		Male	Female
Control 1	Y	Y	Exposure 1	Y	Y
	Y	Y		N	Y
	Y	Y		Y	Y
	Y	Y		Y	Y
	Y	Y		Y	Y
	Y	Y		N	Y
	Y	Y		Y	Y
	Y	Y		Y	Y
	Y	Y		Y	Y
	Y	Y		Y	Y
	Y	Y		Y	Y
	Y	Y		Y	Y
	Y	Y		Y	N
	Y	Y		Y	Y
	Y	Y		Y	Y
	Y	N		Y	Y
	Y	Y		Y	Y
	Y	Y		Y	Y
	Y	Y		Y	Y
	Y	Y		Y	Y
Control 2	Y	Y	Exposure 2	Y	Y
	Y	Y		Y	Y
	Y	Y		Y	Y
	Y	Y		Y	Y
	Y	Y		Y	Y
	Y	Y		Y	Y
	Y	Y		Y	Y
	Y	Y		Y	Y
	Y	Y		Y	Y
	Y	Y		Y	Y
	Y	Y		Y	Y
	Y	Y		Y	Y
	Y	Y		Y	Y
	Y	Y		Y	Y
	Y	Y		Y	Y
	Y	Y		Y	Y
	Y	Y		Y	Y
	Y	Y		Y	Y
	Y	Y		Y	Y
	Y	Y		Y	Y
Control 3	Y	Y	Exposure 3	Y	N
	Y	Y		N	Y
	Y	Y		Y	Y
	Y	Y		Y	Y
	Y	Y		Y	Y
	Y	Y		Y	Y
	Y	Y		Y	Y
	Y	Y		Y	Y
	Y	Y		Y	N
	Y	Y		Y	Y
	Y	Y		Y	Y
	Y	Y		Y	Y
	Y	Y		Y	Y
	Y	Y		Y	Y
	Y	Y		Y	Y
	Y	Y		Y	Y
	Y	Y		Y	Y
	Y	Y		Y	Y
	Y	Y		Y	Y
	Y	Y		Y	N

## Sheet: Fecundity and fertilization
Fecundity		Fertilization
Sample	eggs (million)	fertilization rate (%)
Control 1	4.6375	98.28
Control 2	4.9188	98.03
Control 3	5.0401	94.73
Exposure 1	1.749	97.91
Exposure 2	1.4843	96.36
Exposure 3	1.6823	99.72

## Sheet: ROS, 3-NTP and PC
The ROS level of gonad tissue and gametes
Sample	Testes	Ovaries	Sperm	Egg
Control 1	4.8	5.4	4.32	4.43
Control 2	4.77	4.56	4.18	4.45
Control 3	5.23	5.53	3.69	4.85
Exposure 1	7.22	7.8	5.48	7.03
Exposure 2	7.46	8.69	5.43	6.01
Exposure 3	6.72	8.04	5.06	6.96
The 3-NTP level of gonad tissue and gametes
Sample	Testes	Ovaries	Sperm	Egg
Control 1	2.36	2.1	3.57	3.61
Control 2	1.99	2.33	4.19	4.7
Control 3	2.27	2.93	3.77	4.16
Exposure 1	6.64	8.25	5.28	7.56
Exposure 2	7.52	8.79	5.45	8.31
Exposure 3	7.81	8.84	5.13	7.78
The PC content of gonad tissue and gametes
Sample	Testes	Ovaries	Sperm	Egg
Control 1	1.69	1.76	1.24	1.76
Control 2	1.89	1.98	1.56	1.56
Control 3	1.95	2.29	1.63	1.67
Exposure 1	3.9	3.88	2.78	2.63
Exposure 2	4.24	4.21	2.88	2.29
Exposure 3	4.59	4.05	2.39	2.41

## Sheet: Larval size
Larval size										Average measurement
Treatment	Ind	Larval length	Larval width	Stomach length	Stomach width	Body rod length	Post-oral arm length			Treatment	Larval length	Larval width	Stomach length	Stomach width	Body rod length	Post-oral arm length
CMCF-1	1	426.97	223.69	73.63	80.37	314.79	112.18			CMCF	446.88 ± 37.67	211.02 ± 34.99	78.36 ± 11.43	72.71 ± 8.44	352.23 ± 41.04	94.65 ± 15.55
CMCF-1	2	482.13	231.2	78.35	69.38	378.57	103.56			SMCF	349.36 ± 43.59	147.19 ± 33.26	64.84 ± 9.23	65.5 ± 11.33	292.77 ± 44.61	56.6 ± 6.54
CMCF-1	3	455.47	229.89	90.66	56.51	391.94	63.53			CMSF	303.11 ± 38.77	143.37 ± 25.55	66.87 ± 13.88	66.61 ± 9.29	254.89 ± 41.84	48.23 ± 12.25
CMCF-1	4	462.81	252.14	99.66	72.51	348.49	114.32			SMSF	275.62 ± 25.67	141.59 ± 30.27	59.26 ± 10.33	57.92 ± 6.87	230.44 ± 26.98	45.18 ± 8.55
CMCF-1	5	476.54	159.77	83.93	68.68	397.83	78.71
CMCF-1	6	473.37	245.15	57.15	68.46	354.42	118.95
CMCF-1	7	469.28	218.51	82.92	64.58	371.34	97.94
CMCF-1	8	472.87	162.93	78.35	70.75	391.88	80.99
CMCF-1	9	432.2	185.78	70.41	77.15	371.42	60.78
CMCF-1	10	416.69	219.82	83.63	84.57	314.82	101.87
CMCF-1	11	386.25	187.56	72.47	67.12	300.72	85.53
CMCF-1	12	486.6	231.35	80.4	63.64	419.07	67.53
CMCF-1	13	455.16	218.22	52.84	64.19	336.04	119.12
CMCF-1	14	368.72	179.7	80.92	66.01	256.71	112.01
CMCF-1	15	405.3	223.16	80.28	76.84	305.04	100.26
CMCF-1	16	461.47	181.5	76.81	65.52	370.59	90.88
CMCF-1	17	413.23	256	65.61	77.07	321.71	91.52
CMCF-1	18	480.87	223.57	78.35	81.85	350.94	129.93
CMCF-1	19	419.58	224.93	99.91	71.76	318.72	100.86
CMCF-1	20	515.45	184	85.66	64.45	436.36	79.09
CMCF-1	21	482.4	149.28	77.72	84.11	380.21	102.19
CMCF-1	22	474.39	214.44	93.43	60.67	378.6	95.79
CMCF-1	23	401.2	226.83	54.02	66.6	291.07	110.13
CMCF-1	24	428.27	188.76	77.72	70.62	331.57	96.7
CMCF-1	25	387.2	181.31	101.37	72.71	299.33	87.87
CMCF-1	26	487.12	203.12	60.84	65.06	413.4	73.72
CMCF-1	27	477.02	224.67	78.35	84.76	363.2	113.82
CMCF-1	28	455.28	208.28	85.21	72.71	371.72	83.56
CMCF-1	29	454.75	216.54	69.67	66.81	369.34	85.41
CMCF-1	30	425.58	247.85	78.35	72.71	351.1	74.48
CMCF-1	31	485.45	251.81	58.67	81.06	407.05	78.4
CMCF-1	32	452.53	240.4	67.05	79.13	358.99	93.54
CMCF-1	33	471.17	167.39	73.16	73.9	359.12	112.05
CMCF-1	34	417.55	192.13	73.5	74.75	305.64	111.91
CMCF-1	35	456.38	223.36	90.69	72.82	376.3	80.08
CMCF-1	36	397.31	233.11	74.79	60.35	286.73	110.58
CMCF-1	37	373.93	168.99	78.46	69.43	261.65	112.28
CMCF-1	38	461.15	296.92	87.36	68.38	348.19	112.96
CMCF-1	39	444.61	270.14	80.81	67.28	328.05	116.56
CMCF-1	40	392.66	145	71.55	80	280.15	112.51
CMCF-1	41	419.58	219.65	75.68	76.67	328.95	90.63
CMCF-1	42	419.31	98.75	78.35	85.28	309.05	110.26
CMCF-1	43	496.75	238.5	74.42	77.13	409.78	86.97
CMCF-1	44	483.67	262.58	68.26	75.06	397.88	85.79
CMCF-1	45	452.59	134.82	92.82	86.13	341.44	111.15
CMCF-1	46	477.89	206.28	91.45	68	359.63	118.26
CMCF-1	47	462.97	201.41	74.12	86.42	378.86	84.11
CMCF-1	48	459.75	234.15	88.18	82.53	354.45	105.3
CMCF-1	49	480.26	254.75	79.33	84.55	409.12	71.14
CMCF-1	50	463.67	181.38	66.69	47.82	373.69	89.98
CMCF-2	1	408.98	183.67	92.15	55.84	327.58	81.4
CMCF-2	2	485.04	239.27	88.51	74.46	395.29	89.75
CMCF-2	3	402.6	216.07	96.23	72.31	287.81	114.79
CMCF-2	4	509.5	154.07	89.21	64.43	420.14	89.36
CMCF-2	5	450.61	202.84	89.18	72.71	390.79	59.82
CMCF-2	6	484.94	203.64	87.36	79.4	392.05	92.89
CMCF-2	7	390.66	182.49	82.23	63.5	282.07	108.59
CMCF-2	8	435.33	188.68	78.35	81.32	363.36	71.97
CMCF-2	9	389.54	244.9	89.61	65.51	290.6	98.94
CMCF-2	10	453.84	198.84	78.35	72.71	363.01	90.83
CMCF-2	11	386.84	213.38	84.19	75.66	299.9	86.94
CMCF-2	12	373.66	202.86	72.88	71.7	301.47	72.19
CMCF-2	13	491.26	275.13	66.44	71.08	408.95	82.31
CMCF-2	14	403.98	285.45	73.77	56.71	307.76	96.22
CMCF-2	15	520.38	236.17	78.24	72.9	427.87	92.51
CMCF-2	16	490.9	193.24	66.84	86.25	386.16	104.74
CMCF-2	17	428.43	163.48	73.23	70.89	328.89	99.54
CMCF-2	18	521.03	177.78	70.61	76.38	422.72	98.31
CMCF-2	19	430.45	231.09	92.23	98.08	354.28	76.17
CMCF-2	20	487.86	204.64	78.35	73.18	385.44	102.42
CMCF-2	21	413.85	235.24	77.51	72.71	316.72	97.13
CMCF-2	22	467.34	196.46	90.47	69.02	363.84	103.5
CMCF-2	23	424.79	165.74	84.38	72.71	308.19	116.6
CMCF-2	24	488.06	224.55	85.83	73.05	389.43	98.63
CMCF-2	25	473.94	190.27	62.46	71	368.94	105
CMCF-2	26	507.8	163.31	94.37	72.19	416.89	90.91
CMCF-2	27	478.02	203.77	77.96	82.93	354.72	123.3
CMCF-2	28	460.76	203.78	61.76	80.27	367.35	93.41
CMCF-2	29	452.55	203.67	79.84	70.7	368.38	84.17
CMCF-2	30	505.1	179.63	66.56	68.43	411.99	93.11
CMCF-2	31	465.63	176.82	68.09	67.63	356.89	108.74
CMCF-2	32	528.73	251.49	75.31	66.27	441.17	87.56
CMCF-2	33	430.93	234.88	72.9	68.24	347.11	83.82
CMCF-2	34	397.39	234.81	97.88	65.61	295.37	102.02
CMCF-2	35	452.64	226.94	91.07	72.58	336.32	116.32
CMCF-2	36	438.04	223.35	49.18	74.09	360.87	77.17
CMCF-2	37	434.8	183.48	96.19	76.9	333.02	101.78
CMCF-2	38	495.02	198.13	74.23	70.07	394.99	100.03
CMCF-2	39	467.62	200.68	67.97	77.55	407.53	60.09
CMCF-2	40	434.44	192.58	58.6	67.65	334.98	99.46
CMCF-2	41	392.8	232.13	72.71	88.96	294.21	98.59
CMCF-2	42	513.02	174.98	90.81	57.01	403.37	109.65
CMCF-2	43	432.92	300.7	78.35	66.73	324.68	108.24
CMCF-2	44	433.22	279.7	88.57	67.81	313.5	119.72
CMCF-2	45	490.84	141.55	74.86	56.61	417.55	73.29
CMCF-2	46	498.16	255.92	73.88	67.62	387.77	110.39
CMCF-2	47	444.33	246.92	116.69	71.59	335.22	109.11
CMCF-2	48	489.2	175.03	72.22	77.31	376.17	113.03
CMCF-2	49	408.6	193.13	92.6	67.88	320	88.6
CMCF-2	50	455.51	208.6	93.38	73.94	358.63	96.88
CMCF-3	1	407.9	233.85	78.35	72.44	327.4	80.5
CMCF-3	2	403.8	183.96	71.31	72.81	308.14	95.66
CMCF-3	3	408.47	257.55	67.82	75.55	327.35	81.12
CMCF-3	4	510.27	208.93	77.48	55.62	424.15	86.12
CMCF-3	5	426.83	224.1	85.74	67.31	337.86	88.97
CMCF-3	6	413.51	195.75	68.85	81.24	324.06	89.45
CMCF-3	7	434.14	206.82	64.7	78.06	354.82	79.32
CMCF-3	8	490.03	237.46	81.53	94.09	393.94	96.09
CMCF-3	9	452.72	189.98	78.35	60.93	369.36	83.36
CMCF-3	10	438.45	282.34	88.6	59.96	342.37	96.08
CMCF-3	11	440.37	184.64	74.58	72.21	323.9	116.47
CMCF-3	12	465.34	231.24	78.35	74.68	384.63	80.71
CMCF-3	13	360.7	198.5	90.67	85.77	248.96	111.74
CMCF-3	14	433.86	239.49	65.04	76.65	337.2	96.66
CMCF-3	15	421.36	181.09	89.66	77.02	319.45	101.91
CMCF-3	16	394.1	233.59	78.3	88.11	315.21	78.89
CMCF-3	17	462.26	193.31	85.37	82.9	368.39	93.87
CMCF-3	18	373.09	125.83	88.62	80.32	301.87	71.22
CMCF-3	19	451.42	216.88	103.86	72.71	331.47	119.95
CMCF-3	20	426.64	247.12	52.49	67.17	317.43	109.21
CMCF-3	21	453.4	257.58	63.51	57.97	330.27	123.13
CMCF-3	22	467.4	198.1	75.74	86.36	380.86	86.54
CMCF-3	23	476.48	202.87	68.78	72.71	397.9	78.58
CMCF-3	24	478.2	223.3	69.29	77.88	377.22	100.98
CMCF-3	25	381.44	153.55	78.35	74.37	281.63	99.81
CMCF-3	26	451.49	243.77	71.36	70.59	372.58	78.91
CMCF-3	27	390.16	223.94	62.02	71.29	310.84	79.32
CMCF-3	28	424.53	203.94	71.21	78.21	339.39	85.14
CMCF-3	29	403.46	214.56	78.09	68.18	305.6	97.86
CMCF-3	30	397.56	279.25	70.3	84.65	309.22	88.34
CMCF-3	31	490.62	263	89.04	62.03	413.41	77.21
CMCF-3	32	433.75	231.91	78.35	89.19	336.56	97.19
CMCF-3	33	368.33	195.58	78.24	66.08	292.57	75.76
CMCF-3	34	440.83	205.47	70.2	69.94	337.64	103.19
CMCF-3	35	433.52	177.98	98.08	66.19	347.21	86.31
CMCF-3	36	419.6	172.69	97.4	69.65	299.19	120.41
CMCF-3	37	428.93	197.67	60.59	66.83	335.86	93.07
CMCF-3	38	468.28	204.09	97.08	71.11	347.93	120.35
CMCF-3	39	502.03	198.14	80.28	83.36	391.75	110.28
CMCF-3	40	477.94	233.82	70.07	74.74	399.65	78.29
CMCF-3	41	459.68	287.87	78.35	68.31	375.82	83.86
CMCF-3	42	451.28	184.9	67.24	64.54	355.9	95.38
CMCF-3	43	427.8	172.53	66.26	65.49	335.05	92.75
CMCF-3	44	456.95	206.78	66.02	68.91	354.65	102.3
CMCF-3	45	443.91	179.42	69.4	96.96	336.57	107.34
CMCF-3	46	506.3	237.18	85.84	70.63	435.45	70.85
CMCF-3	47	456.27	226.61	73.92	68.76	383.07	73.2
CMCF-3	48	400.82	175.08	66.27	70.7	349.52	51.3
CMCF-3	49	459.02	189.66	84.21	89.01	355.38	103.64
CMCF-3	50	442.27	221.18	89.54	72.11	370.25	72.02
SMCF-1	1	441.71	164.67	62.87	52.33	385.12	56.59
SMCF-1	2	331.64	165.37	70.57	54.03	267.23	64.41
SMCF-1	3	315.86	117.04	64.84	66.03	268.33	47.53
SMCF-1	4	375.66	166.74	71.7	28.1	326.55	49.11
SMCF-1	5	458.38	129.71	71.43	55.43	396.52	61.86
SMCF-1	6	376.95	113.71	55.68	77.95	323.43	53.52
SMCF-1	7	369.74	172.36	54.61	66.92	308.55	61.19
SMCF-1	8	306.49	134.48	55.18	88.67	247.65	58.84
SMCF-1	9	434.75	93.75	66.44	60.33	377.69	57.06
SMCF-1	10	221.15	126.12	64.87	61.09	158.56	62.59
SMCF-1	11	403.72	114.05	45.26	85.87	344.65	59.07
SMCF-1	12	353.59	167.69	73.77	59.09	301.27	52.32
SMCF-1	13	392.64	161.71	71.93	59.73	327.59	65.05
SMCF-1	14	361.79	203.96	57.12	45.05	293.57	68.22
SMCF-1	15	332.01	132.1	64.84	63.64	282.82	49.19
SMCF-1	16	314.23	117.53	62.89	74.67	267.04	47.19
SMCF-1	17	328.73	166.63	68.26	57.53	266.7	62.03
SMCF-1	18	378.33	182.15	58.03	75.15	321.74	56.59
SMCF-1	19	313.47	157.41	48.79	65.49	256.05	57.42
SMCF-1	20	358.49	163.55	67.59	51.29	300.04	58.45
SMCF-1	21	358.78	138.6	74.8	51.83	300.28	58.5
SMCF-1	22	341.63	206.54	64.84	40.99	284.96	56.67
SMCF-1	23	310.87	180.39	60.28	83.01	245.84	65.03
SMCF-1	24	382.79	140.44	70.16	64.76	330.49	52.3
SMCF-1	25	372.45	160.95	64.84	58.45	309.58	62.87
SMCF-1	26	307.43	127.34	74.08	70.65	257.24	50.19
SMCF-1	27	359.86	171.25	67.2	76.64	291.2	68.66
SMCF-1	28	330.11	182	60.43	65	285.87	44.24
SMCF-1	29	320.52	163.35	64.84	48.84	263.82	56.7
SMCF-1	30	277.99	170.75	60.12	69.72	214.56	63.43
SMCF-1	31	347.06	122.25	60.07	60.99	288.57	58.49
SMCF-1	32	354.52	129.83	72.06	65.49	305.89	48.63
SMCF-1	33	376.79	65.23	72.15	62.17	317.1	59.69
SMCF-1	34	315.28	112.5	49.68	64.87	259.64	55.64
SMCF-1	35	337.42	134.98	65.15	50.81	285.68	51.74
SMCF-1	36	304.86	136.61	77.91	69.15	248.27	56.59
SMCF-1	37	344.49	142.4	61.18	55.77	296.44	48.05
SMCF-1	38	391.99	105.52	76.14	55.5	341.24	50.75
SMCF-1	39	330.67	120.46	91.5	42.48	270.12	60.55
SMCF-1	40	343.47	134.06	54.57	62	294.35	49.12
SMCF-1	41	292.89	134.77	64.84	81.62	237.28	55.61
SMCF-1	42	353.88	83.45	62.24	82.6	309.76	44.12
SMCF-1	43	353.68	179.06	64.84	59.93	292.93	60.75
SMCF-1	44	353.97	122.09	60.66	65.49	292.01	61.96
SMCF-1	45	394.84	127.12	76.7	78.08	340.06	54.78
SMCF-1	46	297.72	132.82	53.58	71.2	244.7	53.02
SMCF-1	47	375.21	178.91	78.88	67.11	320.57	54.64
SMCF-1	48	424.86	112.53	77.91	68.45	370.98	53.88
SMCF-1	49	364.43	133.52	40.75	48.31	310.48	53.95
SMCF-1	50	297.36	135.19	55.56	75.75	240.77	56.59
SMCF-2	1	345.98	188.91	65.46	42.39	287.44	58.54
SMCF-2	2	383.28	138.56	51.14	69.63	325.21	58.07
SMCF-2	3	323.48	119.9	65.95	64.56	259.98	63.5
SMCF-2	4	432.96	123.23	64.74	65.49	369.84	63.12
SMCF-2	5	332.4	179.77	70.9	71.2	272.1	60.3
SMCF-2	6	364.72	84.88	64.84	86.28	312.75	51.97
SMCF-2	7	317.41	171.29	66.64	57.52	254.44	62.97
SMCF-2	8	376.11	104.2	69.47	45.89	316.93	59.18
SMCF-2	9	311.73	183.24	69.7	60.11	243.95	67.78
SMCF-2	10	341.83	131.49	76.13	61.16	297.77	44.06
SMCF-2	11	411.66	183.34	61.45	74.88	360.81	50.85
SMCF-2	12	390.38	70.26	74.75	80.87	334.88	55.5
SMCF-2	13	292.1	113.29	64.22	60.09	227.1	65
SMCF-2	14	359.44	213.81	75.38	76.72	296.82	62.62
SMCF-2	15	341.17	143.7	58.39	48.95	280.91	60.26
SMCF-2	16	255.96	135.85	64.84	68.59	212.18	43.78
SMCF-2	17	306.6	221.54	68.36	87.3	250.01	56.59
SMCF-2	18	318.63	187.72	48.24	65.49	268.06	50.57
SMCF-2	19	349.36	172.08	63.25	54.59	292.77	56.59
SMCF-2	20	474.58	131.57	64.84	56.09	417.99	56.59
SMCF-2	21	369.53	184.95	54.85	89.83	316.55	52.98
SMCF-2	22	343.16	129.32	66.84	71.54	286.2	56.96
SMCF-2	23	372.64	116.32	64.84	86.18	314.28	58.36
SMCF-2	24	384.99	179.72	61.37	48.33	318.97	66.02
SMCF-2	25	355.84	126.16	57.5	69.92	297.37	58.47
SMCF-2	26	361.76	182.9	78.39	72.58	294.88	66.88
SMCF-2	27	405.42	129.97	65.2	65.49	343.99	61.43
SMCF-2	28	387.44	177.94	54.01	65.37	339.58	47.86
SMCF-2	29	362.33	162.1	65.89	79.61	300.25	62.08
SMCF-2	30	358.2	202.58	42.14	68.11	305.55	52.65
SMCF-2	31	386.96	135.3	64.84	65.49	331	55.96
SMCF-2	32	424.75	192.31	62.53	60.86	377.38	47.37
SMCF-2	33	357.68	203.92	64.84	68.76	308.87	48.81
SMCF-2	34	416.01	160.04	69.69	48.05	359.42	56.59
SMCF-2	35	388.13	135.74	71.07	73.14	344.53	43.6
SMCF-2	36	316.48	107.89	85.71	71.38	249.03	67.45
SMCF-2	37	332.91	150.42	69.56	57.25	285.01	47.9
SMCF-2	38	296.02	125.3	64.36	60.11	247.6	48.42
SMCF-2	39	421.9	172.01	64.84	55.52	376.54	45.36
SMCF-2	40	317.41	173.96	63.99	66.1	249.5	67.91
SMCF-2	41	328	128.74	48.4	76.1	266.96	61.04
SMCF-2	42	271.42	112.93	49.84	65.46	210.61	60.81
SMCF-2	43	287.37	198.8	69.03	53.24	230.78	56.59
SMCF-2	44	393.77	187.76	50.71	68.34	345.5	48.27
SMCF-2	45	320.08	209.84	53.24	46.94	271.19	48.89
SMCF-2	46	315.18	160.01	59.03	80.13	257.91	57.27
SMCF-2	47	401.63	96.3	75.05	65.49	348.52	53.11
SMCF-2	48	392.56	128.34	83.38	48.65	329.84	62.72
SMCF-2	49	279.29	151.97	55.95	72.85	222.7	56.59
SMCF-2	50	397.87	179.22	64.84	64.43	340.89	56.98
SMCF-3	1	351.18	165.52	67.84	61.53	303.95	47.23
SMCF-3	2	254.71	117.83	63.05	77.65	195.03	59.68
SMCF-3	3	351.88	177.68	53.94	66.5	291.9	59.98
SMCF-3	4	363.67	168.46	54.58	66.06	314.85	48.82
SMCF-3	5	405.39	195.82	41.55	72.06	345.28	60.11
SMCF-3	6	287.12	118.37	84.65	66.38	228.52	58.6
SMCF-3	7	289.91	189.92	65.44	77.27	230.64	59.27
SMCF-3	8	319.57	129.87	58.17	77.43	261.37	58.2
SMCF-3	9	325.72	139.58	77.91	60.63	272.8	52.92
SMCF-3	10	365.19	189.98	54.58	65.49	302.56	62.63
SMCF-3	11	343.94	125.49	63.76	65.49	293.43	50.51
SMCF-3	12	346.65	169.49	63.57	59.57	290.95	55.7
SMCF-3	13	325.15	173.1	65.01	65.53	274.03	51.12
SMCF-3	14	453.42	129.44	73.62	65.5	397.83	55.59
SMCF-3	15	349.36	108	63.19	70.07	288.53	60.83
SMCF-3	16	294.66	151.44	70.31	64.99	229.68	64.98
SMCF-3	17	308.93	181.85	79.25	66.83	261.52	47.41
SMCF-3	18	340.29	88.33	61.07	78.17	273.73	66.56
SMCF-3	19	400.52	175.82	64.84	60.99	340.84	59.68
SMCF-3	20	360.79	88.26	53.04	74.56	299.73	61.06
SMCF-3	21	318.88	181.47	78.7	40	274.12	44.76
SMCF-3	22	362.73	165.54	72.48	63.98	309.83	52.9
SMCF-3	23	419.37	162.25	61.92	73.28	375.98	43.39
SMCF-3	24	394.25	88.12	81.45	83.19	340.03	54.22
SMCF-3	25	349.58	118.7	63.71	76.41	292.99	56.59
SMCF-3	26	305.4	188.23	53.99	60.22	240.76	64.64
SMCF-3	27	355.45	119.26	65.4	47.97	293.53	61.92
SMCF-3	28	335.7	141.92	48.61	77.9	286.13	49.57
SMCF-3	29	384.89	138.3	67.57	65.36	315.71	69.18
SMCF-3	30	326.76	99.64	76.91	74.53	264.32	62.44
SMCF-3	31	333.61	143.19	58.69	67.89	275.1	58.51
SMCF-3	32	315.5	117.43	68.9	50.74	251.39	64.11
SMCF-3	33	326.63	108.51	65.3	80.94	271.39	55.24
SMCF-3	34	309.7	183.27	44.59	58.25	248.5	61.2
SMCF-3	35	327.35	150.52	60.97	67.74	272.12	55.23
SMCF-3	36	369.15	103.8	67.81	56.79	312.66	56.49
SMCF-3	37	353.42	119.04	74.53	83.08	283.4	70.02
SMCF-3	38	349.83	167.39	64.84	67.04	293.82	56.01
SMCF-3	39	323.76	87.31	79.82	68.37	254.16	69.6
SMCF-3	40	307.98	156.26	70.35	62.58	245.9	62.08
SMCF-3	41	307.09	149.66	60.81	54.87	251.07	56.02
SMCF-3	42	361.58	208.31	64.84	87.93	317.58	44
SMCF-3	43	429.23	156.14	69.33	65.49	357.28	71.95
SMCF-3	44	261.32	150.12	63.48	65.49	200.34	60.98
SMCF-3	45	407.91	153.8	63.75	53.52	360.1	47.81
SMCF-3	46	316.57	108.67	64.91	84.92	259.16	57.41
SMCF-3	47	389.54	185.24	77.13	85.19	344.28	45.26
SMCF-3	48	315.75	141.03	83.3	57.8	261.56	54.19
SMCF-3	49	324.37	88.81	60.44	65.49	271.14	53.23
SMCF-3	50	319.73	174.54	66.11	65.49	268.85	50.88
CMSF-1	1	327.49	107.5	74.41	73.05	279.57	47.92
CMSF-1	2	286.79	153.16	87.7	70.61	221.69	65.1
CMSF-1	3	324.74	193.57	51.53	68.67	300.35	24.39
CMSF-1	4	280.4	182.29	79.15	61.15	248.27	32.13
CMSF-1	5	278.45	117.42	52.85	67.05	233.58	44.87
CMSF-1	6	322.49	166.03	59.05	72.84	299.63	22.86
CMSF-1	7	280.68	154.96	72.73	57.84	216.73	63.95
CMSF-1	8	318.95	162.16	53.38	64.92	284.45	34.5
CMSF-1	9	313.38	123.48	72.1	72.67	253.29	60.09
CMSF-1	10	255.82	79.01	51.28	74.27	193.3	62.52
CMSF-1	11	276.39	171.01	64.25	61.58	235.69	40.7
CMSF-1	12	359.47	148.86	46.29	64.04	300.01	59.46
CMSF-1	13	286.88	132.82	78.32	58.73	228.91	57.97
CMSF-1	14	313.11	119.4	60.47	80.74	279.32	33.79
CMSF-1	15	386.53	170.06	67	60.57	347.18	39.35
CMSF-1	16	337.73	149.73	74.34	66.61	295.15	42.58
CMSF-1	17	215.03	164.99	57.13	85.67	171.1	43.93
CMSF-1	18	307.17	151.54	55.36	61.62	252.53	54.64
CMSF-1	19	266.9	125.8	51.76	67.36	200.63	66.27
CMSF-1	20	325.29	145.71	84.62	94.1	271.16	54.13
CMSF-1	21	381.12	139.33	66.11	61.73	344.65	36.47
CMSF-1	22	346.48	174.38	56.51	48.43	290.51	55.97
CMSF-1	23	278.99	109.7	71.29	85.83	214.82	64.17
CMSF-1	24	221.82	173.4	71.8	49.64	155.37	66.45
CMSF-1	25	334.54	168.45	69.37	69.44	283.03	51.51
CMSF-1	26	257.18	147.22	67.3	66.61	207.9	49.28
CMSF-1	27	226.76	187.97	77.38	54.08	177.9	48.86
CMSF-1	28	280.73	136.09	54.95	61.55	236.23	44.5
CMSF-1	29	248.86	147.74	58.45	76.65	197.37	51.49
CMSF-1	30	330.46	122.36	67.56	83.97	278.59	51.87
CMSF-1	31	282.3	146.72	74.06	64.43	237.36	44.94
CMSF-1	32	337.33	136.87	67.57	86.13	288.32	49.01
CMSF-1	33	280.07	163.51	67.78	66.61	231.84	48.23
CMSF-1	34	337.1	154.86	84.85	64	285.41	51.69
CMSF-1	35	290.16	160.87	71.23	65.83	224.23	65.93
CMSF-1	36	277.45	117	51.06	76.29	219.21	58.24
CMSF-1	37	317.89	124.59	68.86	66.61	289.27	28.62
CMSF-1	38	312.91	115.4	66.91	56	274.38	38.53
CMSF-1	39	362.18	151.66	55.13	80.16	315.17	47.01
CMSF-1	40	361.52	130.14	75.5	64.59	321.64	39.88
CMSF-1	41	309.32	172.37	87.69	66.76	278.55	30.77
CMSF-1	42	284.16	152.21	67.61	57.23	245.03	39.13
CMSF-1	43	256.62	145.38	64.38	68.55	234.83	21.79
CMSF-1	44	293.76	135.63	78.8	81	246.66	47.1
CMSF-1	45	361.56	120.3	63.98	79.09	313.33	48.23
CMSF-1	46	327.06	158.12	54.08	54.24	265.4	61.66
CMSF-1	47	336.91	128.15	74.87	59.81	291.06	45.85
CMSF-1	48	295.32	138.68	96.74	78.4	225.16	70.16
CMSF-1	49	285.25	150.32	57.1	70.57	235.29	49.96
CMSF-1	50	294.95	130.14	74.1	68.6	239.39	55.56
CMSF-2	1	339.85	151.91	52.87	64.07	319.39	20.46
CMSF-2	2	316.7	122.29	61.74	71.07	268.7	48
CMSF-2	3	342.12	110.21	76.43	65.91	295.71	46.41
CMSF-2	4	276.12	115.25	61.64	69.77	227.89	48.23
CMSF-2	5	239.37	151.48	73.41	69.87	200.85	38.52
CMSF-2	6	358.26	111.3	68.58	73.94	282.44	75.82
CMSF-2	7	322.98	140.7	60.19	67.76	276.85	46.13
CMSF-2	8	270.49	174.46	51.72	84.77	227.78	42.71
CMSF-2	9	280.84	120.9	60.69	59.21	227.03	53.81
CMSF-2	10	308.81	165.6	102.23	68.66	262.38	46.43
CMSF-2	11	384.57	185.29	69.59	47.36	328.55	56.02
CMSF-2	12	248.08	138.23	61.21	56.94	208.9	39.18
CMSF-2	13	320.1	130.25	66.27	69.65	264.86	55.24
CMSF-2	14	325.21	174.86	40.16	76.43	256.04	69.17
CMSF-2	15	327.87	122.03	63.99	75.41	270.89	56.98
CMSF-2	16	277.05	156.61	90.87	56.89	215.61	61.44
CMSF-2	17	284.26	155.76	64.52	73.32	241.55	42.71
CMSF-2	18	308.3	145.12	66.28	58.59	283.04	25.26
CMSF-2	19	268.68	132.51	79.17	66.61	205.32	63.36
CMSF-2	20	385.61	141.1	63.74	74.42	368.14	17.47
CMSF-2	21	278.43	137.36	59.21	66.61	226.87	51.56
CMSF-2	22	350.93	115.6	78.95	56.64	293.69	57.24
CMSF-2	23	273.54	95.23	56.61	66.61	220.46	53.08
CMSF-2	24	258.54	119.98	56.29	65.31	216.12	42.42
CMSF-2	25	293.04	162.85	61.36	57.86	232.95	60.09
CMSF-2	26	361.67	129.27	78.02	50.96	305.45	56.22
CMSF-2	27	359.79	163.88	80.18	66.61	321.39	38.4
CMSF-2	28	259.83	124.15	106.3	52.85	219.42	40.41
CMSF-2	29	335.14	186.31	42.9	74.66	290.69	44.45
CMSF-2	30	313.28	145.13	72.56	67.25	263.52	49.76
CMSF-2	31	339.81	190.46	65.48	70	290.43	49.38
CMSF-2	32	335.08	138.83	44.68	66.61	289.24	45.84
CMSF-2	33	272.41	164.24	43.57	54.46	204.79	67.62
CMSF-2	34	365.19	158.48	53.65	57.33	335.71	29.48
CMSF-2	35	292.4	119.79	67.21	49.36	225.95	66.45
CMSF-2	36	245.87	137.95	107.65	68.87	193.26	52.61
CMSF-2	37	319.1	107.56	71.56	66.61	262.29	56.81
CMSF-2	38	269.49	87.66	84.51	67.22	233.17	36.32
CMSF-2	39	279.18	147.03	59.03	52.01	232.41	46.77
CMSF-2	40	296.11	159.86	83.53	66.61	241.77	54.34
CMSF-2	41	355.15	160.01	44.2	58.93	296.43	58.72
CMSF-2	42	336.29	181.25	59.11	57.15	291.51	44.78
CMSF-2	43	246.88	128.3	63.76	71.27	209.41	37.47
CMSF-2	44	274.64	120.18	62.93	66.15	264.28	10.36
CMSF-2	45	307.03	181.5	60.58	61.38	272.65	34.38
CMSF-2	46	258.14	178.83	79.87	74.29	183.12	75.02
CMSF-2	47	289.89	130.69	49.22	57.6	207.91	81.98
CMSF-2	48	337.26	129.68	61.22	74.15	307.02	30.24
CMSF-2	49	266.14	152.15	70.15	62.03	200.48	65.66
CMSF-2	50	330.24	183.43	78.17	69.16	283.86	46.38
CMSF-3	1	289.59	131.33	65.53	50.38	241.36	48.23
CMSF-3	2	229.77	131.78	82.08	76.81	172.36	57.41
CMSF-3	3	298.04	126.46	67.19	82.23	254.94	43.1
CMSF-3	4	395.54	75.94	47.84	73.85	343.94	51.6
CMSF-3	5	290.07	155.61	76.95	77.17	230.8	59.27
CMSF-3	6	307.68	129.51	54.6	78.36	257.46	50.22
CMSF-3	7	362.03	159.82	75.11	65.75	303.42	58.61
CMSF-3	8	325.64	170.28	81.81	55.55	285.89	39.75
CMSF-3	9	234.4	131.3	40.76	57.77	196.62	37.78
CMSF-3	10	294.06	116.2	91.57	63.77	243.26	50.8
CMSF-3	11	289.68	127.57	73.84	58.22	248.93	40.75
CMSF-3	12	294.69	145.86	83.02	68.65	261	33.69
CMSF-3	13	294.9	137.49	59.59	69.8	246.96	47.94
CMSF-3	14	248.66	150.38	71.84	54.74	199.27	49.39
CMSF-3	15	253.46	141.16	49.72	55.81	212.98	40.48
CMSF-3	16	351.99	137.51	64.74	62.68	311.8	40.19
CMSF-3	17	333.03	109.27	57.79	59.73	270.46	62.57
CMSF-3	18	290.79	176.04	38.4	49.9	248.07	42.72
CMSF-3	19	288.87	144.7	90.46	75.28	242.76	46.11
CMSF-3	20	309.02	108.64	74.56	52.67	248.25	60.77
CMSF-3	21	307.81	108.72	83.97	62.08	253.63	54.18
CMSF-3	22	252.07	100.11	69.79	62.87	192.81	59.26
CMSF-3	23	344.7	125.34	59.42	78.45	308.07	36.63
CMSF-3	24	221.84	163.57	68.7	63.12	194.79	27.05
CMSF-3	25	330.83	162.23	62.31	79.4	292.98	37.85
CMSF-3	26	312.01	183.82	66.56	73.29	290.25	21.76
CMSF-3	27	294.82	150.03	64.95	63.56	253.82	41
CMSF-3	28	323.79	148.87	39.29	69.42	279.07	44.72
CMSF-3	29	256.43	140.83	86.79	84	208.81	47.62
CMSF-3	30	353.37	120.93	62.45	76.39	295.23	58.14
CMSF-3	31	371.43	109.56	91.86	74.91	332.17	39.26
CMSF-3	32	251.26	170.73	68.58	50.22	188.76	62.5
CMSF-3	33	335.2	189.45	51.3	66.61	292.06	43.14
CMSF-3	34	338.49	159.02	69.41	66.61	293.09	45.4
CMSF-3	35	326.68	154.68	61.62	69.88	270.18	56.5
CMSF-3	36	266.19	175.08	85.6	66.31	215.05	51.14
CMSF-3	37	292.99	114.15	34.15	81.26	242.12	50.87
CMSF-3	38	295.45	159.3	48.92	46.22	265.15	30.3
CMSF-3	39	261.17	148.12	64.64	73.12	216	45.17
CMSF-3	40	327.92	162.64	64.28	84.23	275.07	52.85
CMSF-3	41	314.32	150.09	91.28	62.87	271.47	42.85
CMSF-3	42	314.25	116.15	61.77	66.44	263.88	50.37
CMSF-3	43	349.39	83.66	87.58	78.61	302.33	47.06
CMSF-3	44	287.7	110.9	57.84	60.47	229.52	58.18
CMSF-3	45	314.15	136.1	44.11	66.61	246.82	67.33
CMSF-3	46	229.85	203.2	79.94	56.12	179.23	50.62
CMSF-3	47	275.19	180.01	78.81	66.61	217.67	57.52
CMSF-3	48	268.78	111.67	47.84	67.6	209.19	59.59
CMSF-3	49	295.04	199.47	60.92	57.39	257.22	37.82
CMSF-3	50	312	118.4	74.66	62.85	267.91	44.09
SMSF-1	1	265.45	190.7	63.48	57.68	203.82	61.63
SMSF-1	2	241.74	163.79	46.85	63.18	192.68	49.06
SMSF-1	3	291.63	172.93	72.35	69.72	229.03	62.6
SMSF-1	4	314.8	130.02	64.62	49.09	276.26	38.54
SMSF-1	5	293.15	176.74	61.29	54.54	244.78	48.37
SMSF-1	6	249.95	156.73	59.37	71.11	196.62	53.33
SMSF-1	7	252.49	55.87	70.01	63.94	216.72	35.77
SMSF-1	8	292.59	113.54	73.52	64.05	241.98	50.61
SMSF-1	9	297.83	156.87	68.8	62.2	245.9	51.93
SMSF-1	10	284.26	125.46	82.38	59.86	230.23	54.03
SMSF-1	11	281.02	162.69	60.27	55.91	235.5	45.52
SMSF-1	12	336.18	162.02	71.19	63.45	280.46	55.72
SMSF-1	13	244.82	157.71	49.91	66.82	207.36	37.46
SMSF-1	14	294.12	115.92	47.9	53.35	254.57	39.55
SMSF-1	15	284.09	164.4	68.71	65.74	253.67	30.42
SMSF-1	16	257.64	144.79	40.85	54.65	203.07	54.57
SMSF-1	17	290.33	120.78	50.25	56.45	229.92	60.41
SMSF-1	18	267.47	136.14	46.05	59.72	229.72	37.75
SMSF-1	19	297.8	120.06	63.43	40.48	248.04	49.76
SMSF-1	20	287.75	138.57	51.33	67.48	253.92	33.83
SMSF-1	21	333.91	149.38	56.16	59.26	286.19	47.72
SMSF-1	22	313.34	213.06	65.93	74.74	263.53	49.81
SMSF-1	23	250.27	107.15	58.97	72.7	205.09	45.18
SMSF-1	24	283.95	140.62	54.85	48.81	240.69	43.26
SMSF-1	25	247.42	114.05	66.52	68.33	207.4	40.02
SMSF-1	26	287.37	194.28	67.2	51.47	235.22	52.15
SMSF-1	27	335.81	145.15	69.16	54.29	292.3	43.51
SMSF-1	28	298.89	136.46	52.11	63.88	252.22	46.67
SMSF-1	29	327.87	133.3	49.95	57.64	281.67	46.2
SMSF-1	30	271.3	170.47	60	55.59	229.98	41.32
SMSF-1	31	282.09	157.4	52.45	61.85	232.19	49.9
SMSF-1	32	249.48	161.68	79.15	60.19	192.44	57.04
SMSF-1	33	299.52	125.98	75.68	49.18	258.98	40.54
SMSF-1	34	261.48	184.12	54.33	44.69	229.1	32.38
SMSF-1	35	293.17	141.59	55	59.71	246.9	46.27
SMSF-1	36	251.29	171.68	77.32	44.35	210.85	40.44
SMSF-1	37	269.03	158.03	76.35	68.79	232.11	36.92
SMSF-1	38	233.54	141.59	55.19	56.78	198.18	35.36
SMSF-1	39	305.96	141.59	52.65	54.95	270.32	35.64
SMSF-1	40	243.62	133.3	72.3	55.74	202.23	41.39
SMSF-1	41	280.63	50.44	37.15	65.68	224.72	55.91
SMSF-1	42	302.48	148.04	58.95	59.83	256.68	45.8
SMSF-1	43	343	195.94	86.62	51.13	302.32	40.68
SMSF-1	44	254.84	171.9	61.91	49.1	213.7	41.14
SMSF-1	45	294.22	129.17	62.58	57.09	255.52	38.7
SMSF-1	46	261.57	140.52	54.5	54.09	211.6	49.97
SMSF-1	47	248.85	153.3	55.99	59.12	196.65	52.2
SMSF-1	48	280.19	223.1	35.72	59.07	239.19	41
SMSF-1	49	264.55	90.86	62.16	55.89	208.68	55.87
SMSF-1	50	261.08	101	42.13	61.77	202.79	58.29
SMSF-2	1	248.02	98.7	67.31	70.28	207.2	40.82
SMSF-2	2	260.5	114.09	55.28	58.99	207.62	52.88
SMSF-2	3	280.5	186.97	58.03	63.1	228.62	51.88
SMSF-2	4	286.22	139.94	70.69	48.01	238.21	48.01
SMSF-2	5	263.84	82.66	50.29	52.71	213.71	50.13
SMSF-2	6	243.49	141.59	52.6	60.54	188.29	55.2
SMSF-2	7	224.57	141.59	57.11	60.36	175.77	48.8
SMSF-2	8	313.53	176.97	44.09	66.74	264.47	49.06
SMSF-2	9	260.7	127.31	50.03	50.92	212.51	48.19
SMSF-2	10	284.2	83.67	68.22	65.03	240.75	43.45
SMSF-2	11	258.51	148.09	51.15	53.38	216.79	41.72
SMSF-2	12	285.25	86.32	76.25	61.29	236.15	49.1
SMSF-2	13	281.13	132.08	60.85	47.49	235.46	45.67
SMSF-2	14	286.54	143.7	66.34	67.83	232.1	54.44
SMSF-2	15	312.22	144.66	53.94	53.4	277.27	34.95
SMSF-2	16	271.54	97.79	71.06	59.6	225.84	45.7
SMSF-2	17	257.39	108.41	57.9	67.03	216.93	40.46
SMSF-2	18	271.49	125.54	57.35	56.18	217.34	54.15
SMSF-2	19	255.52	126.34	45.42	58.98	223.44	32.08
SMSF-2	20	256.26	145.81	60.32	53.6	203.49	52.77
SMSF-2	21	260.17	193.07	59.92	60.97	220.39	39.78
SMSF-2	22	264.3	141.59	49.16	55.95	204.58	59.72
SMSF-2	23	285.08	116.65	50.96	46.46	236.29	48.79
SMSF-2	24	264.51	147.73	62.81	53.16	235.6	28.91
SMSF-2	25	284.39	167.51	41.67	64.54	240.24	44.15
SMSF-2	26	262.7	141.59	54.35	65.11	209.73	52.97
SMSF-2	27	289.02	116.46	67.23	57.19	246.89	42.13
SMSF-2	28	261.12	161.91	59.95	56.24	210.62	50.5
SMSF-2	29	269.76	143.81	65	54.64	227.31	42.45
SMSF-2	30	248.4	199.07	50.16	59.07	203.22	45.18
SMSF-2	31	305.75	160.98	65.5	62.99	255.26	50.49
SMSF-2	32	299.66	135.86	61.47	59.86	236.76	62.9
SMSF-2	33	279.89	144.37	57.27	51.88	224.56	55.33
SMSF-2	34	302.19	94.91	45.32	65.64	251.68	50.51
SMSF-2	35	282.25	111.01	75.59	68.79	245.12	37.13
SMSF-2	36	237.04	160.99	73.12	50.33	197.91	39.13
SMSF-2	37	304.83	86.66	53.84	66.43	255.88	48.95
SMSF-2	38	296.37	150.78	72.91	53.55	242.57	53.8
SMSF-2	39	270.93	122.85	45.25	52.3	229.81	41.12
SMSF-2	40	259.71	168.04	46.37	56.25	221.58	38.13
SMSF-2	41	253.51	136.49	63.58	53.15	209.04	44.47
SMSF-2	42	258.39	170.39	70.09	53.53	213.21	45.18
SMSF-2	43	293.66	122.76	57.17	53.56	247.87	45.79
SMSF-2	44	258.34	141.59	51.39	58.44	208.61	49.73
SMSF-2	45	212.6	141.59	77.46	60.54	169.28	43.32
SMSF-2	46	327.79	133.63	41.99	54.68	276.19	51.6
SMSF-2	47	262.09	155.88	52.78	53.4	223.17	38.92
SMSF-2	48	266.53	116.79	57	63.74	224.73	41.8
SMSF-2	49	262.69	132.17	66.12	56.11	213.56	49.13
SMSF-2	50	311.04	71.53	48.89	58.62	274.27	36.77
SMSF-3	1	266.02	193.55	53.77	53.45	250.16	15.86
SMSF-3	2	270.43	213.18	61.08	56.97	218.34	52.09
SMSF-3	3	269.95	200.82	62.18	56.09	233.12	36.83
SMSF-3	4	246.11	149.19	71.05	56.4	203.73	42.38
SMSF-3	5	260.57	146.92	41.58	58.99	198.59	61.98
SMSF-3	6	251.66	160.76	49.34	53.76	189.96	61.7
SMSF-3	7	317.55	199.18	75.05	37.53	285.38	32.17
SMSF-3	8	254.18	141.71	57.38	62.73	216.76	37.42
SMSF-3	9	260.03	159.82	50.11	44.41	223.58	36.45
SMSF-3	10	283.39	122.38	71.9	54.08	217.76	65.63
SMSF-3	11	303.52	93.37	55.2	62.56	261.2	42.32
SMSF-3	12	303.55	146.32	80.7	60.64	265.89	37.66
SMSF-3	13	297.13	110.31	68.11	55.68	239.94	57.19
SMSF-3	14	319.09	169.35	61.3	53.75	274.64	44.45
SMSF-3	15	269.09	150.18	67.68	68.12	220.92	48.17
SMSF-3	16	225.23	146.9	43.97	59.12	189.14	36.09
SMSF-3	17	296.77	137.72	63.36	57.47	268.05	28.72
SMSF-3	18	269.41	155.17	47.56	66.98	217.53	51.88
SMSF-3	19	211.42	168.38	58.1	68.05	163.16	48.26
SMSF-3	20	258.23	154.56	45.92	52.15	213.05	45.18
SMSF-3	21	250.45	114.46	61.79	59.06	206.84	43.61
SMSF-3	22	249.23	111.4	64.19	52.73	205.7	43.53
SMSF-3	23	316.86	147.68	77.32	61.97	279.71	37.15
SMSF-3	24	307.37	105.02	61.22	69.54	270.73	36.64
SMSF-3	25	248.99	139.21	54.71	42.9	211.85	37.14
SMSF-3	26	264.77	177.76	52.36	49.02	228.21	36.56
SMSF-3	27	283.64	141.32	53.88	57.15	235.64	48
SMSF-3	28	264.7	137.09	41.6	61.71	218.7	46
SMSF-3	29	267.12	168.69	42.66	58.48	212.32	54.8
SMSF-3	30	254.4	121.91	43.82	58.53	217.04	37.36
SMSF-3	31	252.28	157.53	56.59	56.23	203.36	48.92
SMSF-3	32	244.68	138.79	49.37	55.89	211.81	32.87
SMSF-3	33	293.76	132.84	59.85	63.52	263.09	30.67
SMSF-3	34	242.95	157.83	57.22	46.72	201.57	41.38
SMSF-3	35	255.11	102.11	63.5	52.98	200.14	54.97
SMSF-3	36	249.23	136.47	58.87	50.49	219.17	30.06
SMSF-3	37	293.24	129.47	68.03	64.56	255.2	38.04
SMSF-3	38	269.13	121.02	62.99	44.16	217.01	52.12
SMSF-3	39	283.06	94.97	72.46	64.06	240.98	42.08
SMSF-3	40	234.41	197	50.06	43.41	176.24	58.17
SMSF-3	41	301.22	154.38	61.44	60.93	273.79	27.43
SMSF-3	42	284.47	137.08	49.97	61.77	237.64	46.83
SMSF-3	43	303.51	155.21	73.48	61.48	263.91	39.6
SMSF-3	44	299.45	147.23	67.61	69.35	267.84	31.61
SMSF-3	45	298.66	106.44	57.04	62.92	261.57	37.09
SMSF-3	46	279.87	117.87	51.31	57.46	223.67	56.2
SMSF-3	47	317.14	118.82	64.38	60.88	260.37	56.77
SMSF-3	48	289.78	155.14	69.86	48.89	241.8	47.98
SMSF-3	49	270.47	140.4	65.55	54.83	233.66	36.81
SMSF-3	50	247.01	121.07	49.69	58.99	203.96	43.05
