# Supplementary material for: Exposure of adult sea urchin Strongylocentrotus intermedius to stranded heavy fuel oil causes developmental toxicity on larval offspring
Source: PeerJ. 2022 Apr 19;10:e13298. doi: 10.7717/peerj.13298 (PMC9029359; doi:10.7717/peerj.13298)
Supplement: Supplemental Information 4 [file peerj-10-13298-s004.xlsx]

## Sheet: Data S1
TPH concentration
Exposure day	Concentration (μg/L)
0	811.219
1	651.038
2	548.573
3	468.158
4	423.411
5	449.351
6	442.218
7	447.406
8	438.975
9	470.104
10	441.569
11	468.807
12	462.97
13	452.594
14	459.728
15	443.515
16	457.134
17	451.297
18	476.589
19	492.153
20	464.916
21	474.643
