# Supplementary material for: Exposure of adult sea urchin Strongylocentrotus intermedius to stranded heavy fuel oil causes developmental toxicity on larval offspring
Source: PeerJ. 2022 Apr 19;10:e13298. doi: 10.7717/peerj.13298 (PMC9029359; doi:10.7717/peerj.13298)
Supplement: Supplemental Information 5 [file peerj-10-13298-s005.xlsx]

## Sheet: Data S2
PAHs concentration			Percent of total PAH (%)
Exposure day	Concentration (μg/L)		PAH	0 d exposure (%)	21 d exposure (%)
0	6.03657		naphthalene (Nap)	88.1	24.7
1	3.42396		acenaphthylene (Acy)	0.5	1.5
2	2.97349		acenaphthene (Ace)	2.5	7.7
3	2.55802		fluorene (Fle)	2.3	8.8
4	2.25075		phenanthrene (Phe)	4.7	20.9
5	1.70272		anthracene (Ant)	1.1	5.8
6	1.64555		fluoranthene (Fla)	0.1	4.5
7	1.4403		pyrene (Pyr)	0.3	8.9
8	1.94045		benzo[a]anthracene (B[a]A)	0.1	5.5
9	1.40247		chrysene (Chr)	0	8.4
10	1.39781		benzo[b]fuoranthene (B[b]F)	0	0.3
11	1.33809		benzo[k]fuoranthene (B[k]F)	0	0
12	1.54901		benzo[a]pyrene (B[a]P)	0.3	1.1
13	1.46379		indeno[1,2,3-cd]pyrene (I[123-cd]P)	0	1
14	1.49043		dibenzo[a,h]anthracene (D[ah]A)	0	0.4
15	1.33103		benzo[g,h,i]perylene (B[ghi]P)	0	0.5
16	1.53728
17	1.23999
18	1.36276
19	1.55677
20	1.67936
21	1.83152
