# Supplementary material for: Exposure of adult sea urchin Strongylocentrotus intermedius to stranded heavy fuel oil causes developmental toxicity on larval offspring
Source: PeerJ. 2022 Apr 19;10:e13298. doi: 10.7717/peerj.13298 (PMC9029359; doi:10.7717/peerj.13298)
Supplement: Supplemental Information 7 — Data on HSP70 expression in gonad tissues and gametes. [file peerj-10-13298-s007.xlsx]

## Sheet: Sheet2
Relative fold change of HSP70 in male tissue							Relative fold change of HSP70 in female tissue
Sample	CT	18s	△ct	△△ct	2△△ct		Sample	CT	18s	△ct	△△ct	2△△ct
Control 1	25.31	18.09	7.22	0.18	1.13288		Control 1	26.08	15.37	10.71	-0.23	0.852635
Control 1	24.8	17.76	7.04	0	1		Control 1	26.29	15.35	10.94	0	1
Control 1	24.38	17.92	6.46	-0.58	0.668964		Control 1	26.74	15.7	11.04	0.1	1.07177
Exposure 1	24.91	17.37	7.54	0.5	1.41421		Exposure 1	25.05	13.14	11.91	0.97	1.95884
Exposure 1	28.46	20.6	7.86	0.82	1.76541		Exposure 1	29.08	16.89	12.19	1.25	2.37841
Exposure 1	27.23	19.12	8.11	1.07	2.09943		Exposure 1	28.78	16.84	11.94	1	2
Relative fold change of HSP70 in sperm							Relative fold change of HSP70 in egg
Sample	CT	18s	△ct	△△ct	2△△ct		Sample	CT	18s	△ct	△△ct	2△△ct
Control 1	29.41	11.09	18.32	0	1		Control 1	26.03	17.83	8.2	-0.25	0.840896
Control 1	28.8	11.76	17.04	0.26	1.19748		Control 1	26.3	17.85	8.45	0	1
Control 1	28.93	12.92	16.01	-0.06	0.959264		Control 1	24.42	15.71	8.71	0.26	1.19748
Exposure 1	26.55	10.37	16.18	0.49	1.40444		Exposure 1	27.41	18.37	9.04	0.59	1.50525
Exposure 1	29.21	9.6	19.61	0.4	1.31951		Exposure 1	25.65	16.29	9.36	0.91	1.87905
Exposure 1	27.96	10.12	17.84	0.75	1.68179		Exposure 1	28.33	18.97	9.36	0.91	1.87905
